# Supplementary material for: Prospective Study of Hyperglycemia and Cancer Risk
Source: Oxford University Press journal article supplement (doi:10.2337/dc06-0922), 2007-02-27
Supplement: pg561onlineappendix.doc [file pg561onlineappendix.doc]

APPENDIX to Statistics section

RR estimates were corrected for attenuation due to random variations over time in plasma glucose levels. For this purpose, a standard classic measurement error model was assumed, where each of the two replicate measurements of exposure (*X*) were assumed to be linearly related to unknown true glucose levels (*T*) and measurement errors (), as

Xij = Ti + ij [1]

where *i* = 1, …, nindexes individual measurements, for replicate *j* = 1,2. In [1], it is assumed that ij ~ (0, j2), and errors are strictly random. This implies that observed measurements fluctuate randomly around study subjects' true levels. In addition, it is assumed that random errors in *Xi*1 and *Xi*2 are independent, given *Ti* (i.e. cov(i1, i2 = 0)). In this study, replicates of glucose measurements were taken about ten years apart, and the replicate measurements of glucose were approximately 10 percent higher than the first set of measurements, (mean levels at first and second measurement for fasting and post load glucose were 5.12 (SD 0.81) and 5.68 micromol (SD 0.97) and 6.26 (1.45) and 6.91 micromol (SD1.62), respectively). For this reason, for the second set of measurements, the following measurement error relationship was assumed

Xi2 = Ti + ci + i2 [1]

where it wasassumed that ci ~ (C, c2), and that ci was not correlated to random errors ijnor to Ti*.*

Further, it was assumed that c2 was not too sizeable, and it could be treated as random error. To remove any scaling difference (equal to constant C in model [2]), the values of Xi2 were centered on the average values of the first set of measurements.

A corrected estimate of log-RR, , was obtained by dividing the log of the parameter that expresses the risk of developingcancer for one unit increase in glucose values estimated from the first set of measures, , by the intraclass correlation coefficient (ICC) between Xi1 and Xi2. The ICC expresses the amount of between-subject glucose variation over the total variability observed. For this purpose, between- and within-subjects variance components were computed using a mixed model in the sample with replicate glucose measurements. In the mixed model study subjects were modeled as random effects.

Corrected RR comparing top vs. bottom quartile were estimated as , where Q4 and Q1 represent the 12.5 and 87.5 percentile of glucose measurements, assuming that exposure follow a normal distribution with mean equal to the mean of the first (baseline) set of glucose measurements (from the full cohort), and variance equal to the between-subject variability.

The variability of the measurement errors adjusted parameter was corrected to take into account the uncertainty in the correction factor in the mixed model. For this purpose, a bootstrap sampling procedure has been employed (18) and a double sampling scheme was adopted (32), by sampling both from the subcohort with replicate measurements, and from the entire cohort, for the evaluation of the exposure/risk association. A total of 1 000 repetitions were performed. The 95% confidence interval of the corrected risk parameter were obtained using the 2.5th and the 97.5th percentiles of the bootstrap distribution.
